# Supplementary material
Source: PubMed Central journal article supplement (PMC555705)

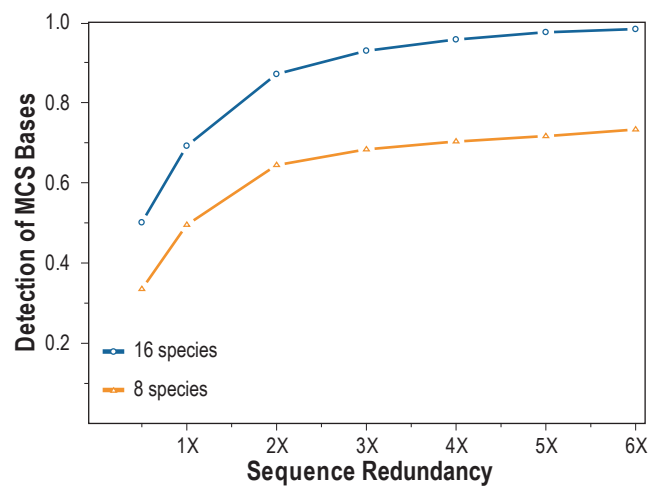

Supplement: pnas_102_13_4795__1.pdf [file pnas_102_13_4795__1.pdf]

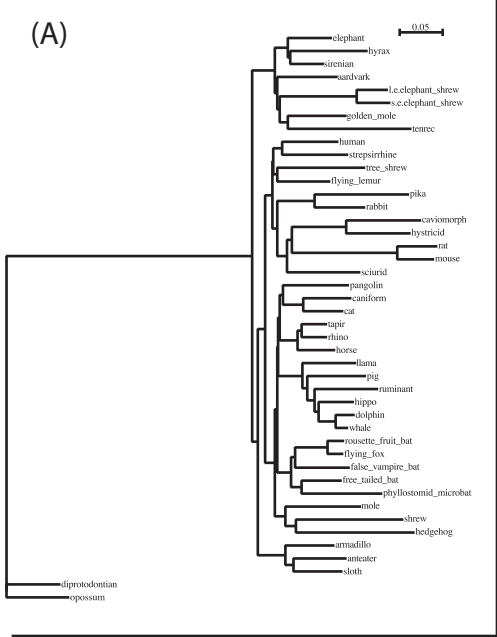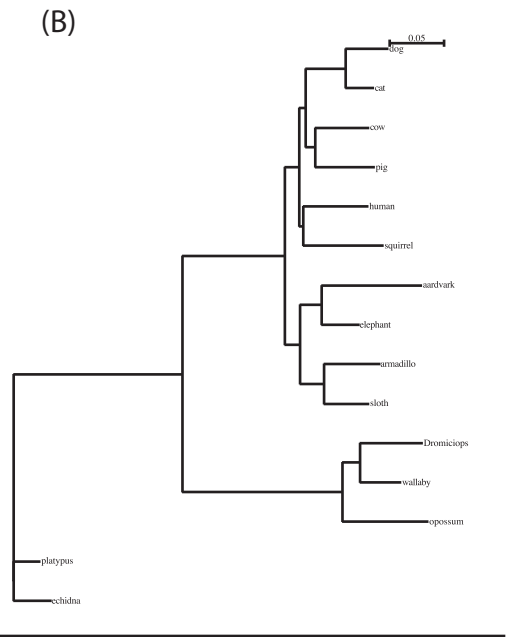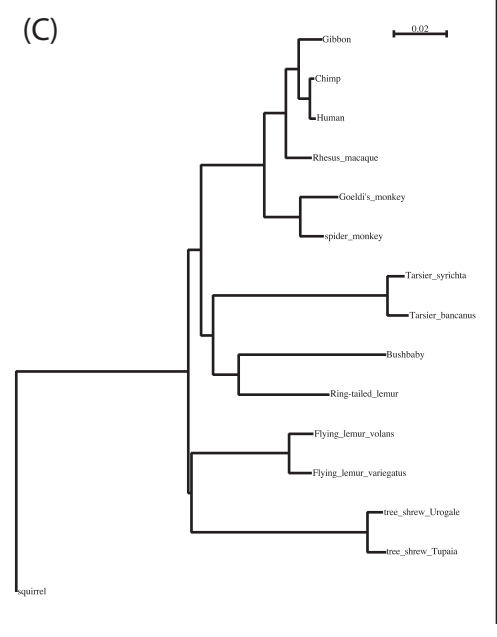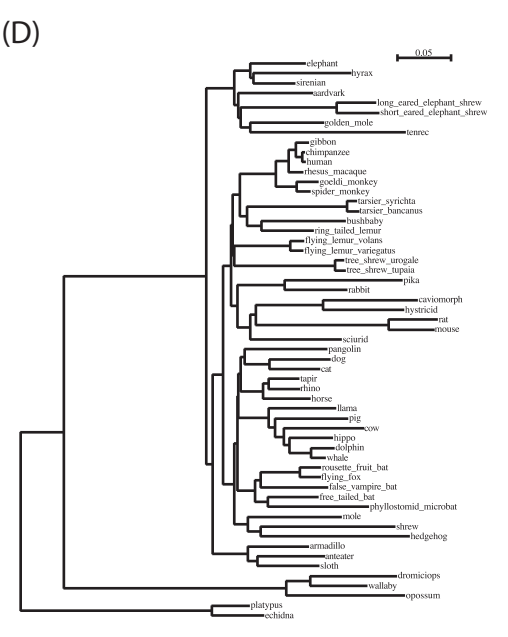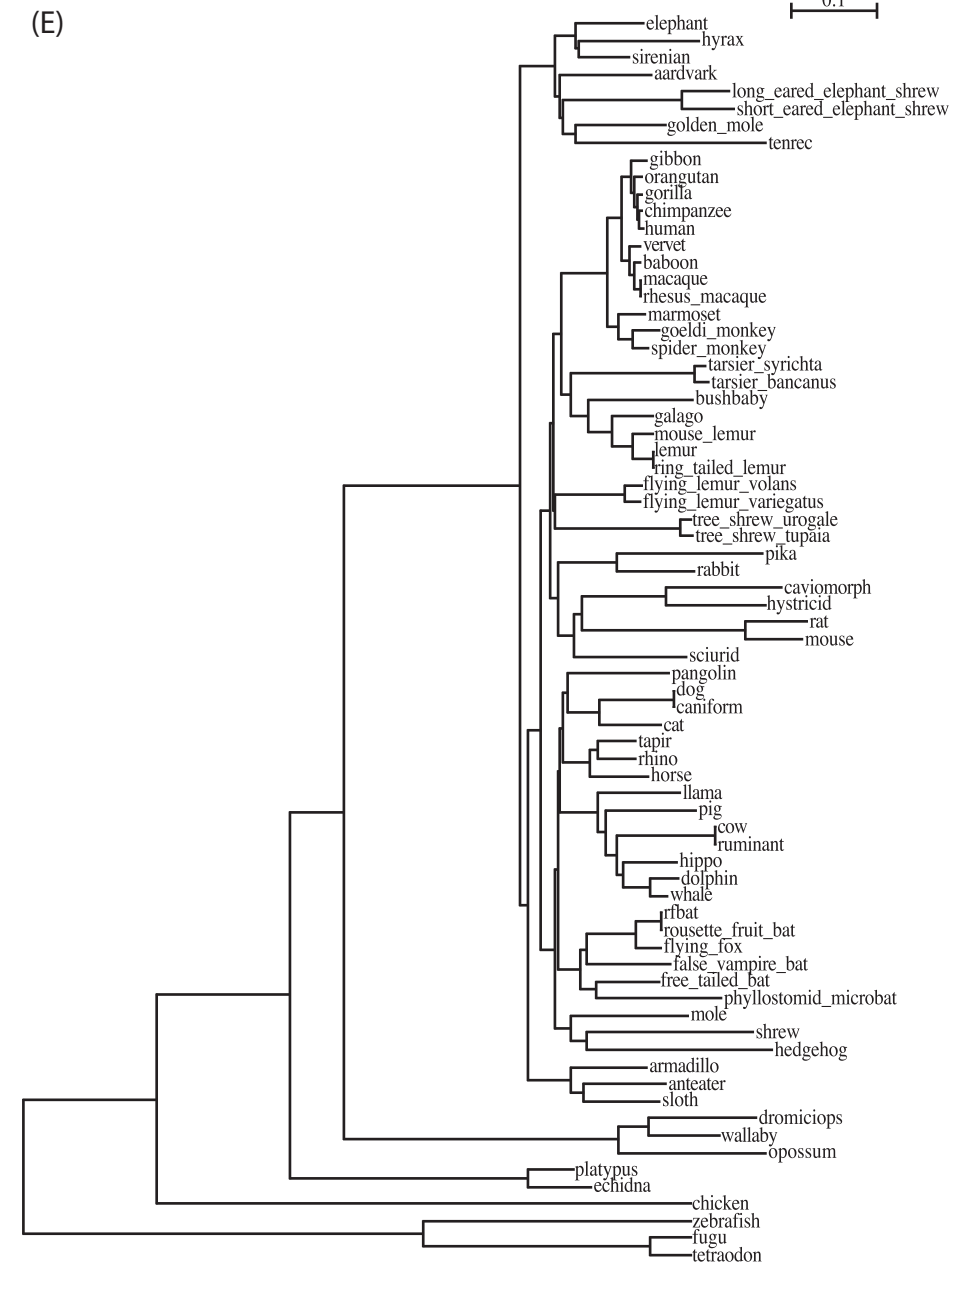

Supplement: pnas_102_13_4795__2.pdf [file pnas_102_13_4795__2.pdf]

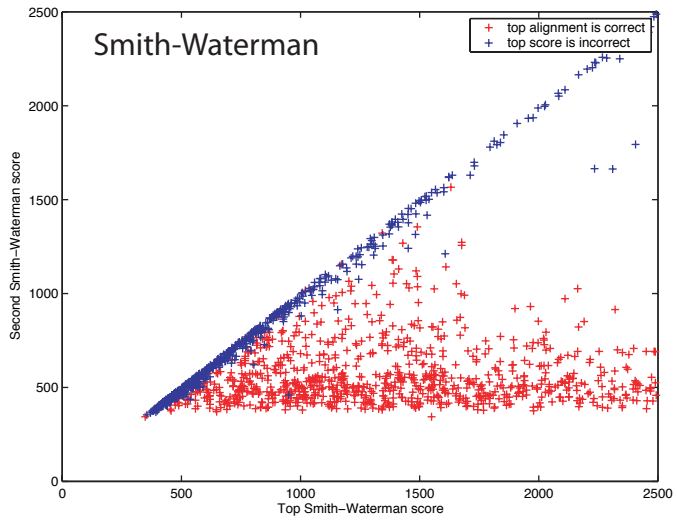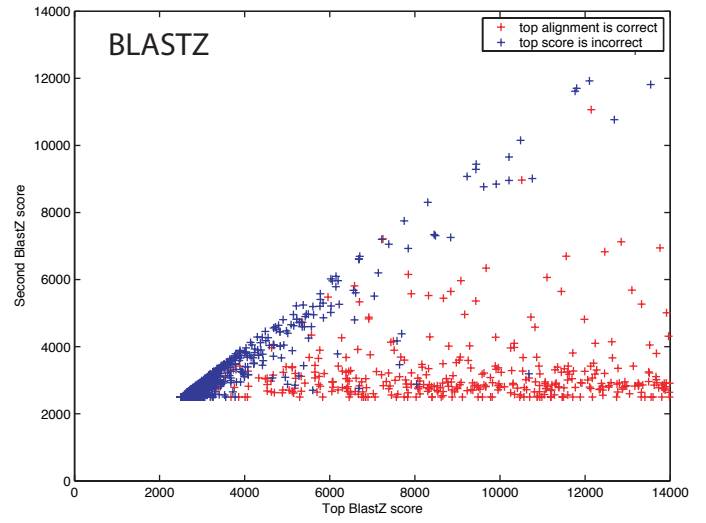

Supplement: pnas_102_13_4795__3.pdf [file pnas_102_13_4795__3.pdf]

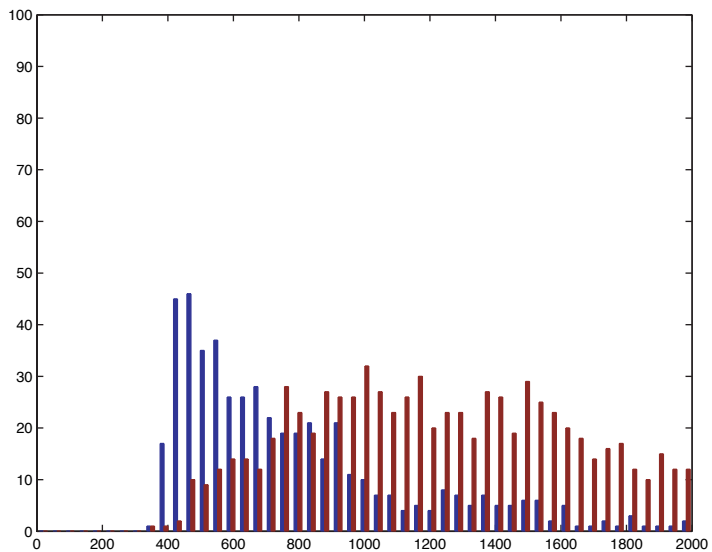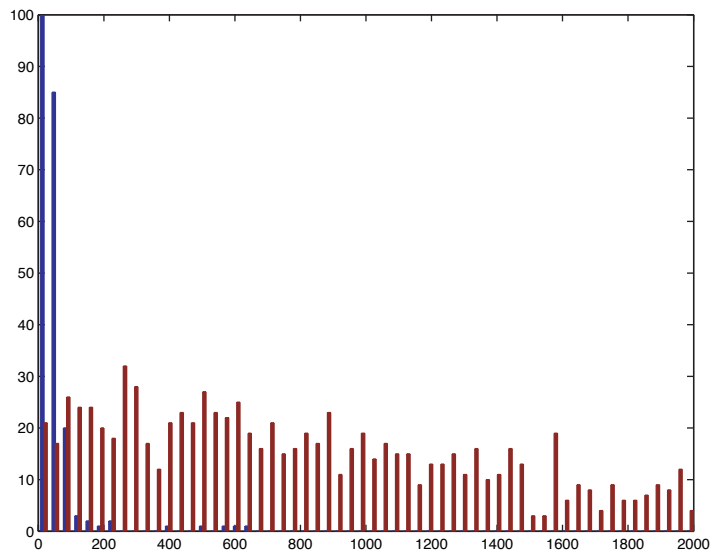

Supplement: pnas_102_13_4795__4.pdf [file pnas_102_13_4795__4.pdf]

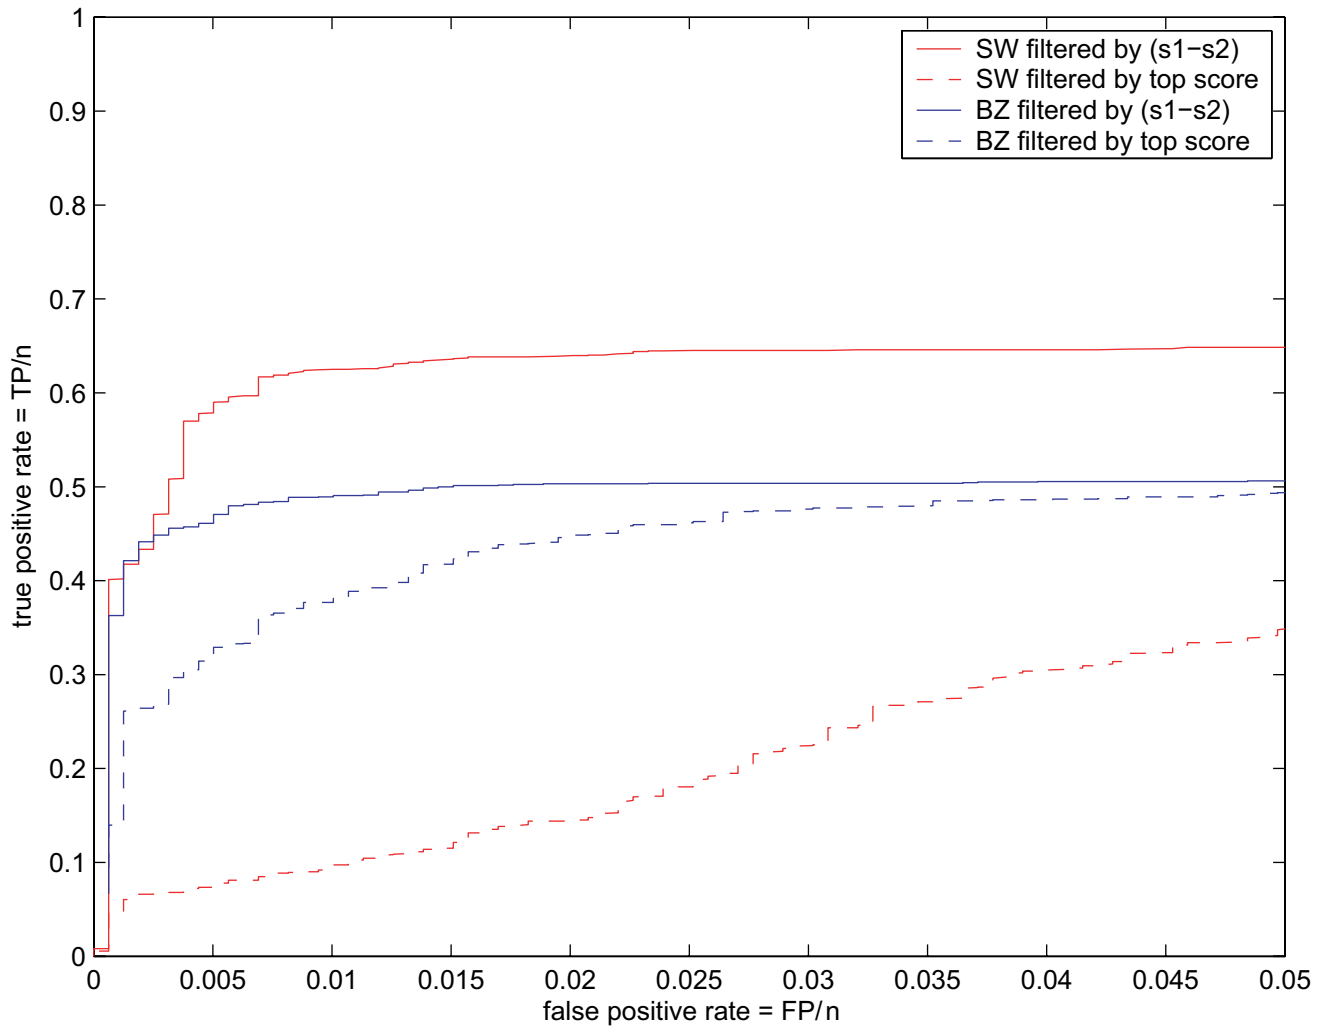

Supplement: pnas_102_13_4795__5.pdf [file pnas_102_13_4795__5.pdf]

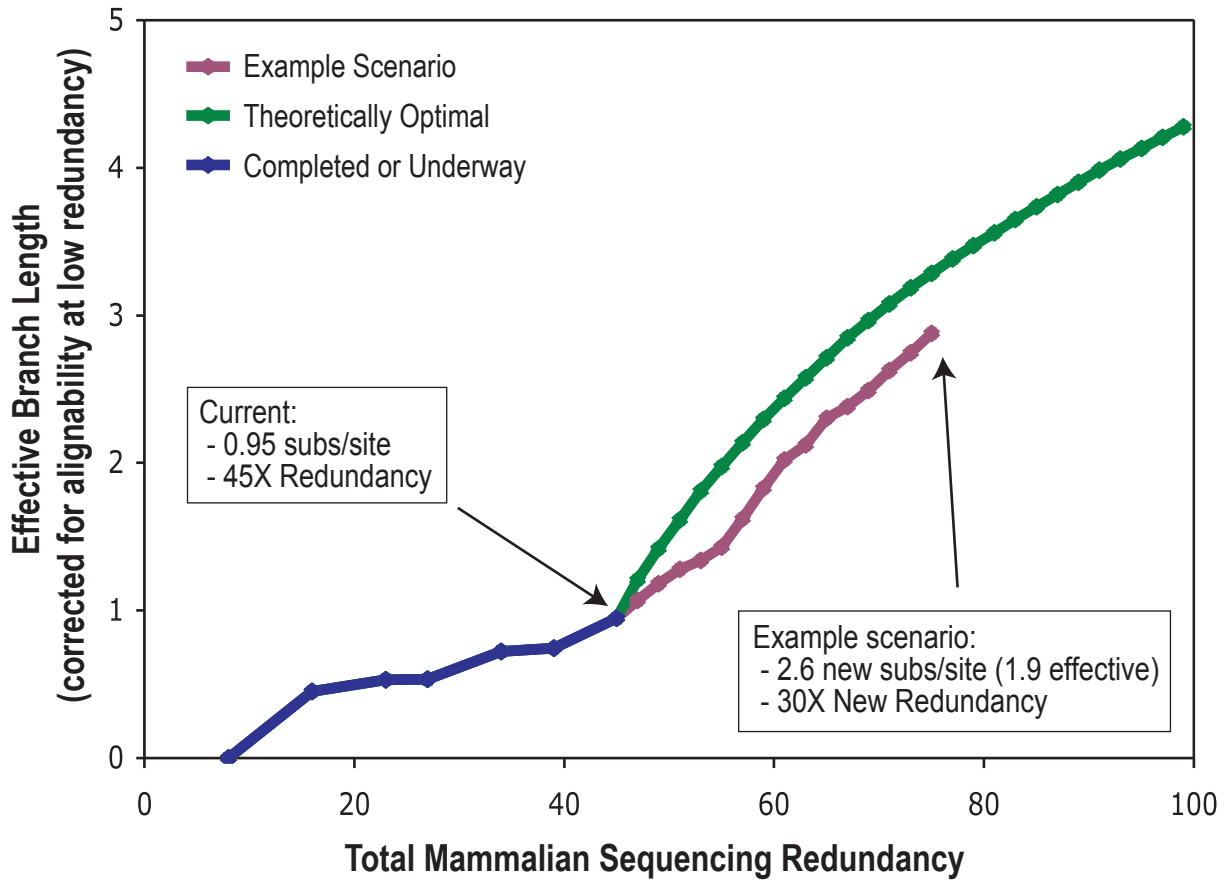

Supplement: pnas_102_13_4795__6.pdf [file pnas_102_13_4795__6.pdf]
